# Supplementary material for: Calcineurin regulates aldosterone production via dephosphorylation of NFATC4
Source: JCI journal article supplement (doi:10.1172/jci.insight.157027), 2023-06-13

# Supplementary information

Manuscript Title: Calcineurin regulates aldosterone production via dephosphorylation of NFATc4

Mesut Berber<sup>1,2,8</sup>, Sining Leng<sup>3</sup>, Agnieszka Wengi<sup>1</sup>, Denise V. Winter<sup>4</sup>, Alex Odermatt<sup>4</sup>, Felix Beuschlein<sup>2,5,6</sup>, Johannes Loffing<sup>1,2</sup>, David T. Breault<sup>3,7,\*</sup>, David Penton<sup>1,2,9,\*</sup>

<sup>1</sup>Institute of Anatomy, University of Zurich, Switzerland,

<sup>2</sup>Swiss National Centre for Competence in Research “Kidney Control of Homeostasis” (NCCR Kidney.CH)

<sup>3</sup>Department of Pediatrics, Harvard Medical School and Division of Endocrinology, Boston Children’s Hospital, Boston, Massachusetts, USA

<sup>4</sup>Swiss Centre for Applied Human Toxicology and Division of Molecular and Systems Toxicology, Department of Pharmaceutical Sciences, University of Basel, Basel, Switzerland

<sup>5</sup>Department of Endocrinology, Diabetology and Clinical Nutrition, University Hospital Zurich (USZ) and University of Zurich (UZH), Zurich, Switzerland

<sup>6</sup>Medizinische Klinik und Poliklinik IV, Klinikum der Universität München, Munich, Germany

<sup>7</sup>Harvard Stem Cell Institute, Cambridge, Massachusetts, USA

<sup>8</sup>Current address: Department of Pediatrics, Harvard Medical School and Division of Endocrinology, Boston Children’s Hospital, Boston, Massachusetts, USA.

<sup>9</sup>Current address: Electrophysiology Facility (e-phac), University of Zurich, Switzerland

\*David T. Breault and David Penton contributed equally to this study

To whom correspondence should be addressed:

Dr. David Penton

Electrophysiology Facility

University of Zurich

Winterthurerstrasse 190

8057 Zurich

**Email:** [david.pentonribas@uzh.ch](mailto:david.pentonribas@uzh.ch)

Phone : +41 44 63 54835

## Contents

|                                                                                                                                                        |    |
|--------------------------------------------------------------------------------------------------------------------------------------------------------|----|
| Supplementary Figure 1: Tacrolimus blunts K <sup>+</sup> and AngII-stimulated CYP11B2 upregulation in NCI-H295R cell line.....                         | 3  |
| Supplementary Figure 2: Characterization of ZG-CnB1-cKO animals .....                                                                                  | 4  |
| Supplementary Figure 3: 24h tacrolimus treatment blunts baseline CYP11B2 expression in NCI-H295R cells.....                                            | 5  |
| Supplementary Figure 4: Characterization of ZG-CnB1-iKO mice.....                                                                                      | 6  |
| Supplementary Figure 5: Tacrolimus treatment does not affect cell membrane sensitivity to changes in extracellular K <sup>+</sup> concentrations ..... | 7  |
| Supplementary Figure 6: Two group comparison of phosphoproteomic data and kinome analysis following K <sup>+</sup> stimulation .....                   | 8  |
| Supplementary Figure 7: Immunoblot profile of NFATc4 is changed upon treatment with alkaline phosphatase.....                                          | 9  |
| Supplementary Figure 8: Role of NFATc4 in steroidogenesis of NCI-H295R cells .....                                                                     | 10 |
| Supplementary Figure 9: NFATc4 binding motifs in CYP11B2 promoter and expression of NFAT isoforms in NCI-H295R cells .....                             | 11 |
| Supplementary Table 1: Patient information of adrenal tissues used ex vivo incubation .....                                                            | 12 |
| Supplementary Table 2: Urinary steroid profile of female ZG-CnB1-cKO mice under standard and high K <sup>+</sup> diet measured by UPLC-MS/MS.....      | 13 |
| Supplementary Table 3: Blood parameters of ZG-CnB1-cKO mice under standard diet All values are given as mean $\pm$ SD. ) .....                         | 14 |
| Supplementary Table 4: Blood Physiological parameters of ZG-CnB1-iKO mice under high K <sup>+</sup> diet15                                             |    |
| Supplementary Table 5: Plasma steroid profile of ZG-CnB1-iKO mice under high K <sup>+</sup> diet measured by UPLC-MS/MS.....                           | 16 |
| Supplementary Table 6: Antibody list.....                                                                                                              | 17 |
| Supplementary Table 7: Primer list.....                                                                                                                | 18 |
| Supplementary Table 8: TaqMan gene expression assay list (Applied biosystems).....                                                                     | 19 |
| Supplementary Methods .....                                                                                                                            | 20 |
| Automated Patch clamp .....                                                                                                                            | 20 |
| Generation of AS-CreER mouse model .....                                                                                                               | 20 |

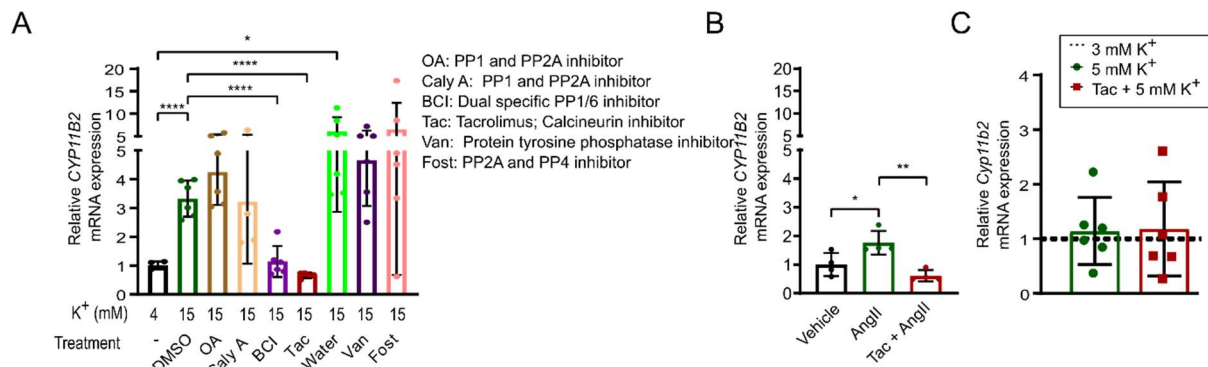

Supplementary Figure 1: Tacrolimus blunts K<sup>+</sup> and AngII-stimulated CYP11B2 upregulation in NCI-H295R cell line. **(A)** NCI-H295R cells were stimulated with 15 mM K<sup>+</sup> in the presence of okadaic acid (OA), calyculin A (Caly A), E-2-Benzylidene-3-(cyclohexylamino)-2,3-dihydro-1H-inden-1-one (BCI), tacrolimus (Tac), sodium orthovanadate (Van) and fostriecin (Fost) for 6 h after preincubation with these protein phosphatase inhibitors for 1 h (n=3-6). DMSO and water were used as vehicle control. *CYP11B2* expression levels were determined by qPCR. Statistical differences assessed by Student's t-test. (\*p<0.05, \*\*\*\*p < 0.0001) **(B)** NCI-H295R cells were pre-incubated with vehicle or 10 nM tacrolimus for 1 h before stimulation with 10 nM AngII for 6 h in the presence of vehicle or tacrolimus respectively. . Statistical differences assessed by one-way ANOVA with Tukey's multiple comparison post-test (n=4, \*p<0.05, \*\*p<0.01) **(C)** Adrenal glands fragments from male C57BL/6 mice were perfused, *ex vivo*, with buffer containing vehicle or Tacrolimus (10 nM) for 60 min followed by buffer containing 5 mM K<sup>+</sup> or 5 mM K<sup>+</sup> + Tac for 90 min (n=6). The contralateral adrenal from each mouse was perfused with 3 mM K<sup>+</sup> as a control. *Cyp11b2* expression levels were determined by qPCR.

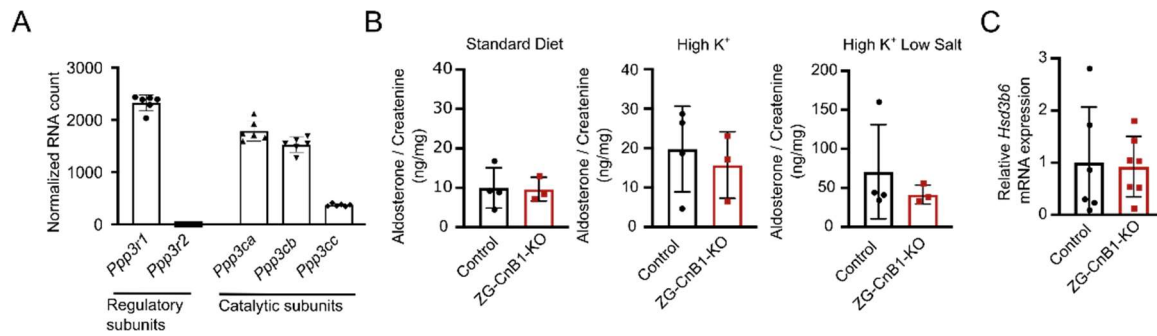

**Supplementary Figure 2: Characterization of ZG-CnB1-cKO animals** **(A)** Expression pattern of regulatory and catalytic subunits of calcineurin in female mouse adrenal glands. (Reanalysis of RNAseq Data: GSE144503 (Leng S. et al., 2020)). **(B)** 24h urinary aldosterone in male ZG-CnB1-cKO mice under standard diet, high K<sup>+</sup> diet and HK+LS diet was assessed via ELISA and adjusted to urinary concentration via normalization to creatinine. Statistical differences assessed by Student's t-test. **(C)** Female mice were sacrificed under HK+LS diet and expression of hydroxy-delta-5-steroid dehydrogenase, 3 beta- and steroid delta-isomerase 6 (Hsd3b6) in adrenals was assessed by quantitative PCR.

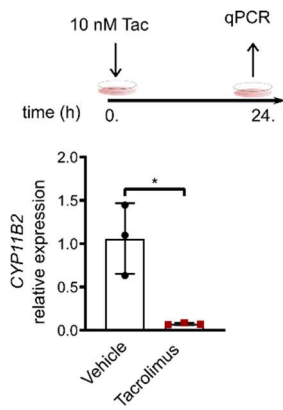

Supplementary Figure 3: 24h tacrolimus treatment blunts baseline CYP11B2 expression in NCI-H295R cells. NCI-H295R cells were treated with 10 nM tacrolimus or vehicle (DMSO) for 24 h. CYP11B2 mRNA expression levels were determined by qPCR. Statistical differences assessed by Student's t-test. (n=3, \*p<0.05)

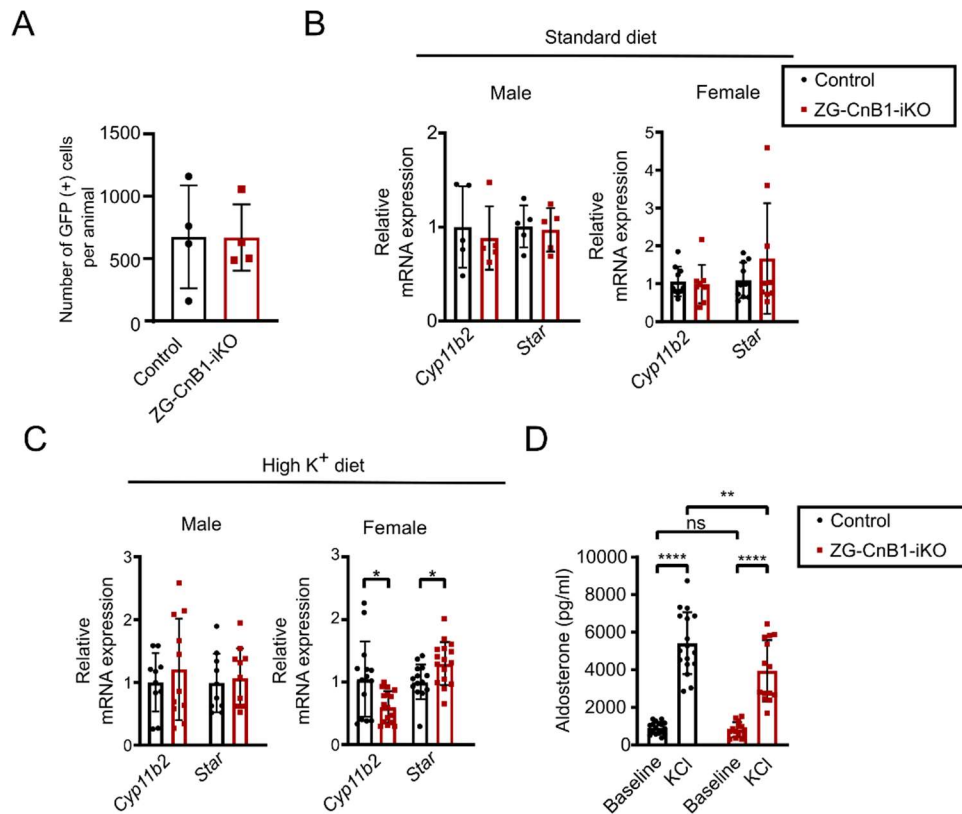

**Supplementary Figure 4: Characterization of ZG-CnB1-iKO mice** **(A)** Number of GFP (+) cells in adrenals from control and ZG-CnB1-iKO animals determined by fluorescence-activated single cell sorting (FACS). Statistical differences assessed by *Cyp11b2* and *Star* mRNA expression in adrenal gland lysates from control and ZG-CnB1-iKO animals fed with **(B)** standard and **(C)** high K<sup>+</sup> diet assessed by qPCR. Statistical differences assessed by Student's t-test. (\* $p < 0.05$ ) **(D)** Ex vivo incubation of adrenal glands from control ( $n = 17$ ) and ZG-CnB1-iKO ( $n = 14$ ) female animals. In the graph, each dot represents the aldosterone production of both adrenals from control or ZG-CnB1-iKO mice. Baseline for each preparation was assessed by measuring aldosterone concentration after incubation with 3 mM K<sup>+</sup>. Statistical differences assessed by two-way ANOVA with Tukey's multiple comparison post-test. (\*\* $p < 0.01$ , \*\*\*\* $p < 0.0001$ )

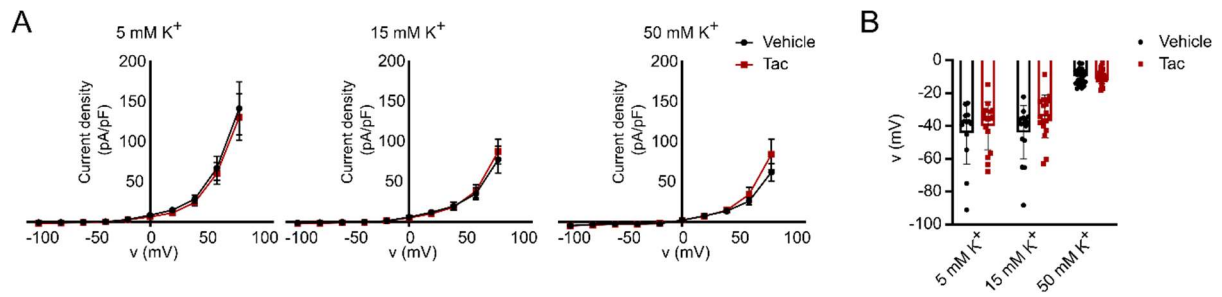

Supplementary Figure 5: Tacrolimus treatment does not affect cell membrane sensitivity to changes in extracellular K<sup>+</sup> concentrations. (A) Current density measured in NCI-H295R cells treated with vehicle or tacrolimus in response to 5 (left panel), 15 (middle panel) and 50 (right panel) mM K<sup>+</sup> in the extracellular medium. (B) Changes in the reversal potential of NCI-H295R cells treated with vehicle or tacrolimus in response to 5-, 15- or 50-mM K<sup>+</sup> in the extracellular medium. Measurements in A and B were assessed in an unbiased manner in freshly detached NCI-H295R cells using automated patch clamp (QPatchII, Sophion).

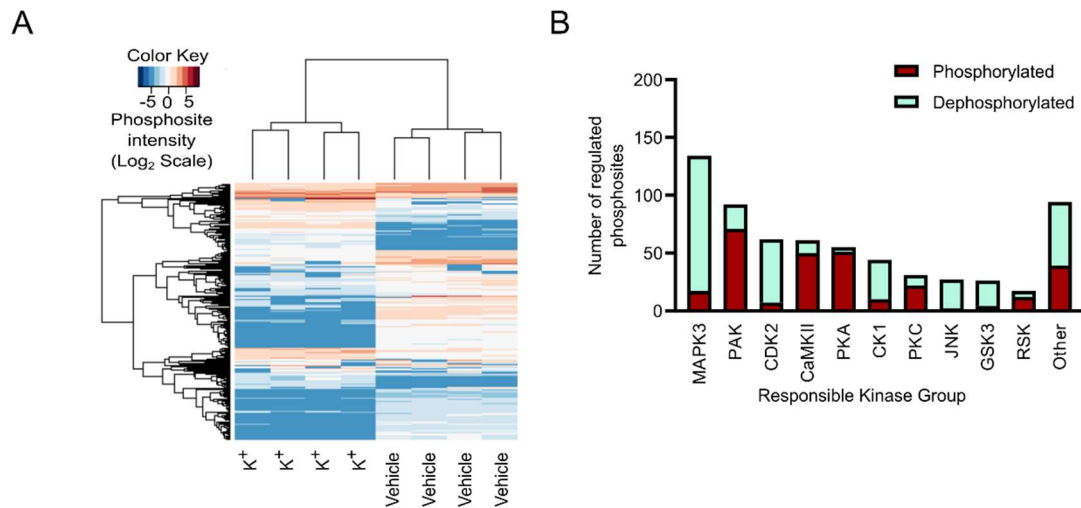

Supplementary Figure 6: Two group comparison of phosphoproteomic data and kinome analysis following  $K^+$  stimulation. **(A)** Heatmap showing unsupervised hierarchical clustering of phosphosites significantly regulated between vehicle and  $K^+$  stimulated cells ( $q\text{Value} < 0.05$  and  $\text{Log}_2\text{FC} > 1$ ). **(B)** The kinome of  $K^+$  stimulated cells was determined by NetworkKin analysis using the differentially regulated phosphosites between vehicle and  $K^+$  treatments. The top 10 kinase groups were shown in the graph. (MAPK3: Mitogen activated protein kinase 3, PAK: p21-activated kinase, CDK2: Cyclin dependent kinase 2, PKA: Protein kinase A, CK1: Casein kinase 1, PKC: Protein kinase C, JNK: c-Jun N-terminal kinases, GSK3: Glycogen synthase kinase 3, RSK, Ribosomal S6 kinase)



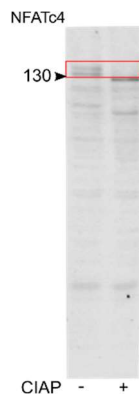

Supplementary Figure 7: Immunoblot profile of NFATc4 is changed upon treatment with alkaline phosphatase. NCI-H295R cell lysates were incubated with calf intestinal alkaline phosphatase (CIAP) for 1 h at 37 °C. Immunoblot showing the total NFATc4 in CIAP-treated NCI-H295R cell lysates. Molecular weight is indicated on the left in kDa. Phospho-specific bands are shown in red rectangle.

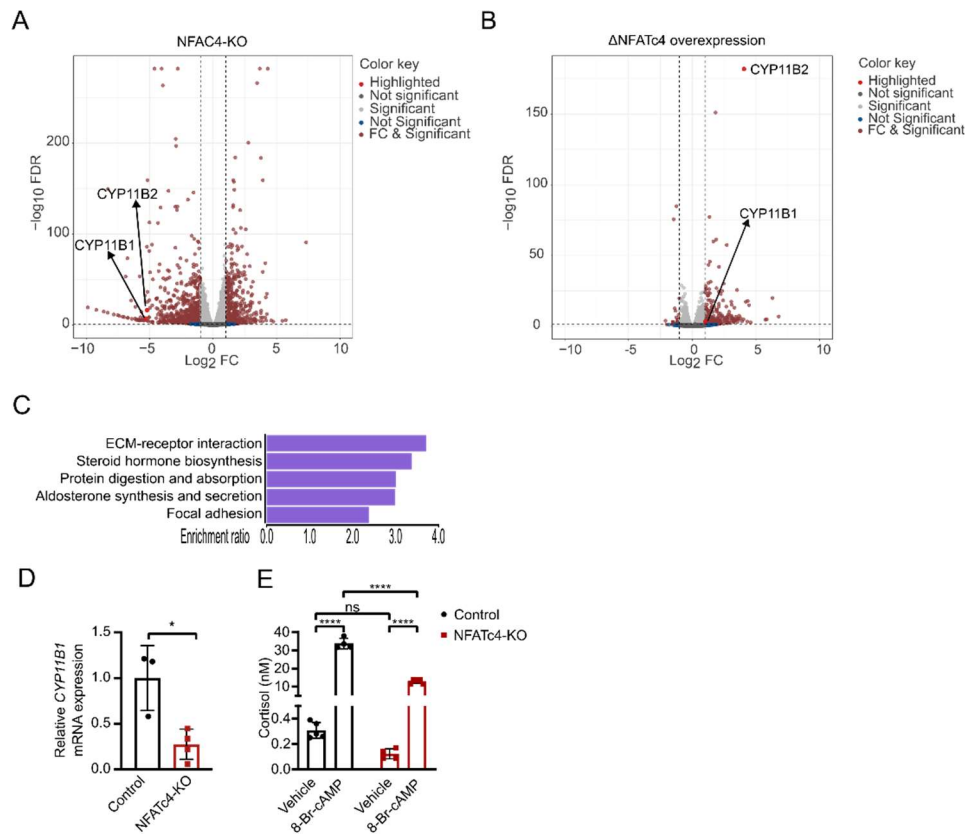

**Supplementary Figure 8: Role of NFATc4 in steroidogenesis of NCI-H295R cells.** Volcano-plot visualization of differentially expressed transcripts in **(A)** NFATc4-KO NCI-H295R cell line and **(B)** constitutively active NFATc4 ( $\Delta$ NFATc4) overexpressing NCI-H295R cells. ( $\text{Log}_2\text{FoldChange}$  ( $\text{Log}_2\text{FC}$ )  $> 2$  and False Discovery Rate (FDR)  $< 0.05$  values are accepted as significant) **(C)** Significantly enriched Kyoto Encyclopedia of Genes and Genomes (KEGG) pathways of dysregulated transcripts in NFATc4-KO NCI-H295R cell line. **(D)** *CYP11B1* mRNA expression in control and NFATc4-KO NCI-295R cells assessed by qPCR. Statistical differences assessed by Student's t-test. (\* $p < 0.05$ ). **(E)** Cortisol concentration in the supernatant of control and NFATc4-KO was assessed by ultra-performance liquid chromatography tandem-mass spectrometry (UPLC-MS/MS) in cells treated with vehicle, 1 or 0.5 mM 8-bromo-Cyclic AMP (8-Br-AMP) for 48h. Statistical differences assessed by two-way ANOVA with Tukey's multiple comparison post-test. (ns: not significant, \*\*\*\* $p < 0.0001$ )).

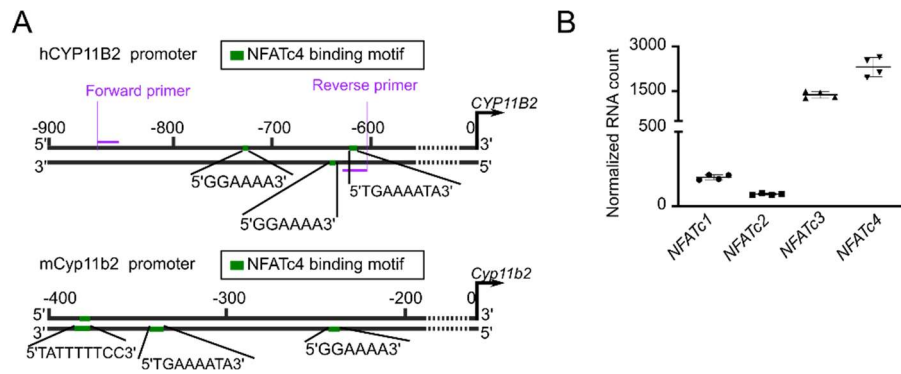

Supplementary Figure 9: NFATc4 binding motifs in CYP11B2 promoter and expression of NFAT isoforms in NCI-H295R cells **(A)** Graphical representation of the predicted NFATc4 binding motifs in human and mouse aldosterone synthase promoter using the PATCH bioinformatic tool. **(B)** mRNA expression pattern of NFATc protein family in control NCI-H295R cell line.

Supplementary Table 1: Patient information of adrenal tissues used ex vivo incubation

| <u>Patient #</u> | <u>Sex</u>  | <u>Age</u> | <b>Blood K<sup>+</sup> levels before surgery (mM)</b> | <b>Medication</b>                                                          |
|------------------|-------------|------------|-------------------------------------------------------|----------------------------------------------------------------------------|
| <u>1</u>         | <u>Male</u> | <u>59</u>  | 4                                                     | Spironolactone, Amlodipine, Perindopril, Macrogol, Paracetamol, Metamizole |
| <u>2</u>         | <u>Male</u> | <u>53</u>  | 4.2                                                   | Verapamil, Doxazosin, Paracetamol, Metamizole                              |
| <u>3</u>         | <u>Male</u> | <u>53</u>  | 4.2                                                   | Captopril, Paracetamol, Metamizole                                         |
| <u>4</u>         | <u>Male</u> | <u>64</u>  | 3.5                                                   | Eplerenone, Candesartan, Hydrochlorothiazid, Amlodipin                     |

Supplementary Table 2. Urinary steroid profile of female ZG-CnB1-cKO mice under standard and high K<sup>+</sup> diet measured by UPLC-MS/MS

All values are normalized to urinary creatinine and given as mean  $\pm$  SD in mg/mg. Statistical differences assessed by Student's t-test. (\*p < 0.05). Number of animals in brackets.

|                          | Standard diet   |                   | High K <sup>+</sup> Diet |                   |
|--------------------------|-----------------|-------------------|--------------------------|-------------------|
|                          | Control (n=4)   | ZG-CnB1-cKO (n=6) | Control (n=5)            | ZG-CnB1-cKO (n=7) |
| Aldosterone              | 1.1 $\pm$ 1.2   | 0.5 $\pm$ 0.4     | 9.9 $\pm$ 5.0            | 3.2 $\pm$ 3.0*    |
| 18-OH-Corticosterone     | 94.0 $\pm$ 38.5 | 54.2 $\pm$ 22.7   | 56.0 $\pm$ 24.4          | 32.0 $\pm$ 15.1   |
| Corticosterone           | 29.3 $\pm$ 19.0 | 16.6 $\pm$ 6.1    | 39.5 $\pm$ 19.1          | 38.7 $\pm$ 20.7   |
| 11-DOC                   | 0.9 $\pm$ 0.5   | 0.9 $\pm$ 0.6     | 2.1 $\pm$ 1.0            | 1.7 $\pm$ 0.9     |
| 11-dehydrocorticosterone | 7.7 $\pm$ 7.5   | 2.9 $\pm$ 1.2     | 8.0 $\pm$ 4.5            | 5.9 $\pm$ 2.8     |
| Progesterone             | 3.3 $\pm$ 2.0   | 3.0 $\pm$ 2.2     | 8.3 $\pm$ 3.3            | 5.4 $\pm$ 2.8     |
| Testosterone             | 0.3 $\pm$ 0.2   | 0.2 $\pm$ 0.1     | 0.6 $\pm$ 0.2            | 0.4 $\pm$ 0.2     |

Supplementary Table 3: Blood parameters of ZG-CnB1-iKO mice under standard diet .

All values are given as mean  $\pm$  SD. Number of animals in brackets.

|                        | Male                |                     | Female               |                     |
|------------------------|---------------------|---------------------|----------------------|---------------------|
|                        | Control             | ZG-CnB1-iKO         | Control              | ZG-CnB1-iKO         |
| pNa <sup>+</sup> (mM)  | 149.8 $\pm$ 0.8 (6) | 149.8 $\pm$ 0.5 (4) | 150.8 $\pm$ 0.9 (10) | 151.3 $\pm$ 1.7 (7) |
| pK <sup>+</sup> (mM)   | 4.9 $\pm$ 0.3 (6)   | 4.7 $\pm$ 0.3 (4)   | 4.4 $\pm$ 0.3 (10)   | 4.5 $\pm$ 0.5 (7)   |
| pCa <sup>2+</sup> (mM) | 1.3 $\pm$ 0 (6)     | 1.3 $\pm$ 0 (4)     | 1.3 $\pm$ 0.1 (10)   | 1.3 $\pm$ 0.1 (7)   |
| pCl <sup>-</sup> (mM)  | 109 $\pm$ 0.9 (6)   | 109 $\pm$ 0.8 (4)   | 110.5 $\pm$ 2.5 (10) | 111.4 $\pm$ 3.8 (7) |

Supplementary Table 4: Blood Physiological parameters of ZG-CnB1-iKO mice under high K<sup>+</sup> diet

All values are given as mean  $\pm$  SD. Statistical differences assessed by Student's t-test. (\*p < 0.05)

|                                     | Male                |                      | Female               |                       |
|-------------------------------------|---------------------|----------------------|----------------------|-----------------------|
|                                     | Control             | ZG-CnB1-iKO          | Control              | ZG-CnB1-iKO           |
| pNa <sup>+</sup> (mM)               | 154.6 $\pm$ 9.7 (9) | 151.1 $\pm$ 2.2 (12) | 150.4 $\pm$ 1.5 (14) | 149.3 $\pm$ 1.1 (15)* |
| pK <sup>+</sup> (mM)                | 4.3 $\pm$ 0.6 (9)   | 5.1 $\pm$ 2 (12)     | 4 $\pm$ 0.4 (14)     | 4 $\pm$ 0.4 (15)      |
| pCa <sup>2+</sup> (mM)              | 1.3 $\pm$ 0.1 (9)   | 1.3 $\pm$ 0.1 (12)   | 1.3 $\pm$ 0.1 (14)   | 1.3 $\pm$ 0 (15)      |
| pCl <sup>-</sup> (mM)               | 110.1 $\pm$ 2.9 (9) | 110.3 $\pm$ 3.6 (12) | 106.7 $\pm$ 3.3 (14) | 107 $\pm$ 2.8 (15)    |
| pH                                  |                     |                      | 7.3 $\pm$ 0.1 (14)   | 7.4 $\pm$ 0.0 (15)    |
| <i>Renin</i>                        |                     |                      |                      |                       |
| <i>mRNA</i> (normalized to control) |                     |                      | 1.0 $\pm$ 1.0 (14)   | 1.1 $\pm$ 0.6 (15)    |

Supplementary Table 5. Plasma steroid profile of ZG-CnB1-iKO mice under high K+ diet measured by UPLC-MS/MS

All values are given as mean  $\pm$  SD in nM. Statistical differences assessed by Student's t-test. (\*p < 0.05)

|                 | Male                  |                       | Female               |                       |
|-----------------|-----------------------|-----------------------|----------------------|-----------------------|
|                 | Control               | ZG-CnB1-iKO           | Control              | ZG-CnB1-iKO           |
| Aldosterone     | 0.6 $\pm$ 0.3 (10)    | 0.6 $\pm$ 0.2 (13)    | 0.5 $\pm$ 0.3 (10)   | 0.5 $\pm$ 0.2 (9)     |
| Corticosterone  | 252.6 $\pm$ 93.3 (10) | 287.9 $\pm$ 98.2 (13) | 214.2 $\pm$ 88 (10)  | 237.6 $\pm$ 121.1 (9) |
| 11-DHC          | 75.5 $\pm$ 39.9 (10)  | 94.2 $\pm$ 35.3 (13)  | 55.1 $\pm$ 29.5 (10) | 74.7 $\pm$ 52.1 (9)   |
| Testosterone    | 0.3 $\pm$ 0.5 (10)    | 0.6 $\pm$ 0.9 (13)    | 0.1 $\pm$ 0.1 (10)   | 0.1 $\pm$ 0.1 (9)     |
| 11-DOC          | 4.6 $\pm$ 2 (10)      | 4.3 $\pm$ 2.2 (13)    | 4.7 $\pm$ 1.8 (10)   | 5.2 $\pm$ 1.8 (9)     |
| Androstenedione | 0.3 $\pm$ 0.1 (10)    | 0.3 $\pm$ 0.2 (13)    | 0.1 $\pm$ 0.1 (10)   | 0.3 $\pm$ 0.1 (9)*    |
| Progesterone    |                       |                       | 4.4 $\pm$ 2.9        | 5.8 $\pm$ 9.8         |



Supplementary Table 6. Antibody list

| Antibody                  | Host    | Source                                                                                           | Catalog number / Reference        | Dilution IF | Dilution WB |
|---------------------------|---------|--------------------------------------------------------------------------------------------------|-----------------------------------|-------------|-------------|
| Anti-pCREB (Ser 133)      | Rabbit  | Cell Signaling Technology                                                                        | 9198                              | -           | 1/1000      |
| Anti-NFATc4               | Rabbit  | abcam                                                                                            | ab3447                            | -           | 1/1000      |
| Anti-Actin                | Mouse   | Sigma Aldrich                                                                                    | A5316                             | -           | 1/5000      |
| Anti-ATF1                 | Rabbit  | Cell Signaling Technology                                                                        | 25177S                            | -           | 1/1000      |
| Anti-Tubulin              | Rabbit  | Cell Signaling Technology                                                                        | 2128                              | -           | 1/1000      |
| Anti-rabbit IgG secondary | Goat    | Licor                                                                                            | 926-32211                         | -           | 1/30000     |
| Anti-mouse IgG secondary  | Goat    | Licor                                                                                            | 926-32220                         | -           | 1/10000     |
| Anti-Aldosterone Synthase | Rabbit  | Dr. Celso E. Gomez-Sanchez (University of Mississippi Medical Center, Jackson, Mississippi, USA) | [Wotus et al. Endocrinology 1998] | 1/100       | -           |
| Anti-rabbit IgG secondary | Donkey  | Jackson ImmunoResearch                                                                           | 711-611-152                       | 1/200       | -           |
| Anti-rabbit IgG secondary | Chicken | Invitrogen                                                                                       | A-21443                           | 1/200       | -           |
| Anti-T7 Tag               | Goat    | abcam                                                                                            | ab9138                            | -           | -           |
| Polyclonal Goat IgG       | Goat    | R&D Systems                                                                                      | AB-108-C                          | -           | -           |

## Supplementary Table 7. Primer list

### qPCR Primers

| Species | Primer Name  | Sequence                       |
|---------|--------------|--------------------------------|
| Human   | GAPDH fwd    | 5`CTGACTTCAACAGCGACACC3`       |
| Human   | GAPDH rvr    | 5`TAGCCAAATTCGTTGTCATAC3`.     |
| Human   | CYP11B2 fwd  | 5`CAGCTGGGACATTGGTACAGG3`      |
| Human   | CYP11B2 rvr  | 5`CAGCGCTGGGGATTATACCG3`       |
| Mouse   | mGapdh fwd   | 5`CCATCACCATCTTCCAGGAG3`       |
| Mouse   | mGapdh rvr   | 5`TCCATGGTGGTGAAGACAC3`        |
| Mouse   | mCyp11b2 fwd | 5`AACTACAGTGGCATTGTG3`         |
| Mouse   | mCyp11b2 rvr | 5`GATTGCTGTCGTGTCAAC3`         |
| Mouse   | mStar fwd    | 5`CAGGCATGGCCACACATTTT3`       |
| Mouse   | mStar rvr    | 5`CTGCGATAGGACCTGGTTGA3`       |
| Mouse   | mRenin fwd   | 5`GGAGGAAGTGTTCTCTGTCTACTACA3` |
| Mouse   | mRenin rvr   | 5`GCTACCTCCTAGCACCCACCTC3`     |

### ChIP Primers

|       |                      |                               |
|-------|----------------------|-------------------------------|
| Human | CYP11B2 promoter fwd | 5`GACCCAGCCTCTAGAAAAAAAAA3`   |
| Human | CYP11B2 promoter rvr | 5`ATCCTAGGAGTATTTTCACTGTCTT3` |

Supplementary Table 8. TaqMan gene expression assay list (Applied biosystems)

| <b>Species</b> | <b>Gene</b> | <b>Assay catalog number</b> |
|----------------|-------------|-----------------------------|
| Human          | GAPDH       | Hs02786624_g1               |
| Human          | NR4A2       | Hs01117527_g1               |
| Human          | CYP11B1     | Hs01596404_m1               |
| Mouse          | Actb        | Mm02619580_g1               |
| Mouse          | Cyp11b2     | Mm01204955_g1               |
| Mouse          | Hsd3b6      | Mm07306505_m1               |

## Supplementary Methods

### Automated Patch clamp

For whole cell automated patch clamp, NCI-H295R cells grown until ~80% confluent and then incubated with vehicle (DMSO) or 10 nM tacrolimus for one hour. Cells were used immediately after detaching with Accutase (Sigma-Aldrich, Buchs, Switzerland) and resuspended in an extracellular solution containing (in mM) 135 NaCl, 1.8 MgCl<sub>2</sub>, 1.8 CaCl<sub>2</sub>, 10 HEPES, 5 KCl, pH 7.4 adjusted NaOH / HCl. 3.0 x 10<sup>6</sup> cells / mL and then directly added to the centrifuge tube of the QPatchII automated patch clamp platform (Sophion Bioscience, Ballerup, Denmark). 48X single hole QChips with a resistance of ~2 MΩ were used for experiments with an intracellular solution containing (in mM) 95 K-gluconate, 30 KCl, 4.8 Na<sub>2</sub>HPO<sub>4</sub>, 1.2 NaH<sub>2</sub>PO<sub>4</sub>, 5 glucose, 2.38 MgCl<sub>2</sub>, 0.73 CaCl<sub>2</sub>, 1 EGTA, 3 Mg-ATP, pH 7.2 adjusted KOH / HCl. No seal enhancer and no junction potential correction (11 mV measured for the solution pair) was used. Only cells maintaining a seal resistance of >1GΩ, and with stable access resistance throughout the experiment, were used (~50% success rate). After obtaining the whole cell patch clamp, the extracellular solution was exchanged twice with solution containing 5, 15, 50 mM K<sup>+</sup> and a protocol including 20 mv voltage steps (-100 to +80 mV, holding potential -60 mV, 200 ms) was applied. The osmolality of the extracellular solution was kept constant by proportionally decreasing the concentration of NaCl for increasing concentrations of KCl (e.g., in mM 135 NaCl + 5 KCl or 90 NaCl + 50 KCl) . Current density was calculated using steady state current (average of last 100 ms of each step) divided by the cell capacitance measured immediately before each protocol.

### Generation of AS-CreER mouse model

AS-CreER model generation was described in “Leng, Sining. 2019. Regulation of Adrenocortical Morphogenesis and Function by WNT and FGF Signaling. Doctoral dissertation, Harvard University, Graduate School of Arts & Sciences”, accessible at <http://nrs.harvard.edu/urn-3:HUL.InstRepos:42029609>

## Uncropped images of western blots and agarose gel electrophoresis in the manuscript

Full unedited gels for Figure 4

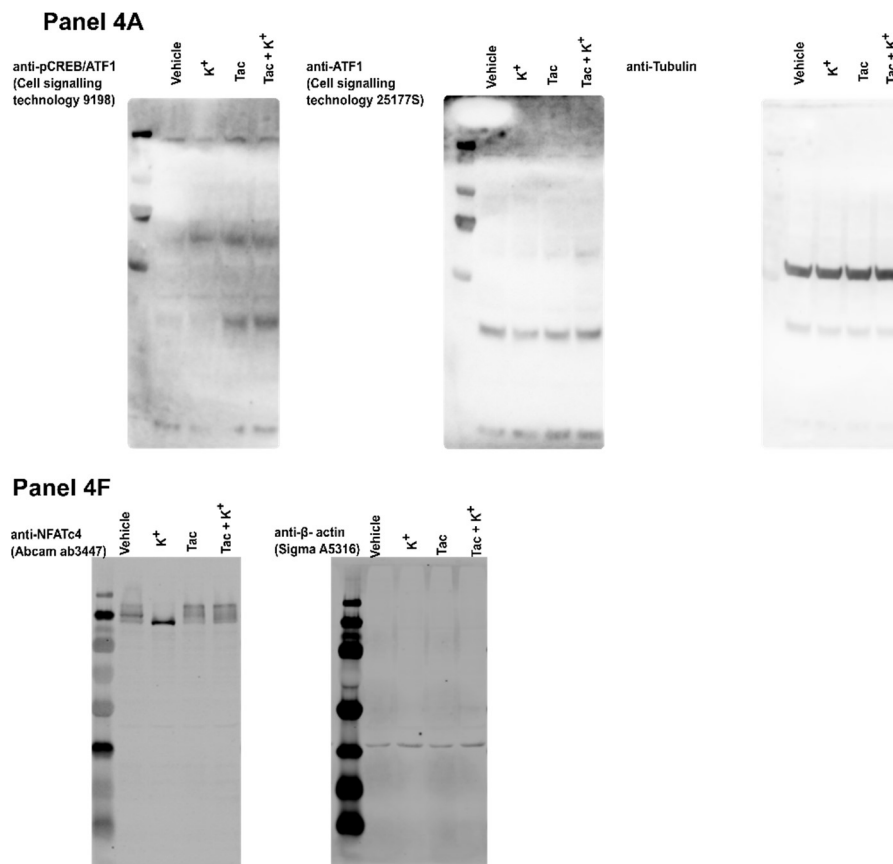

Full unedited gels for Figure 5

Panel 5A

Lanes in black reactangles are shown in the figure.

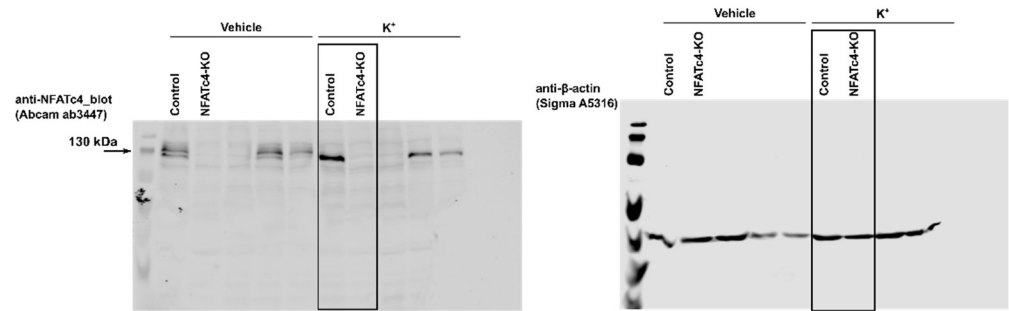

Panel 5F

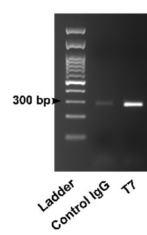

## Full unedited gel for Supplementary Figure 7

### Supplementary Figure 7

anti-NFATc4\_blot  
(Abcam ab3447)

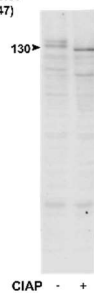

Supplement: sd1 [file 1]
